# Supplementary material for: Development of new dehydrocostuslactone derivatives for treatment of atopic dermatitis via inhibition of the NF-κB signaling pathway
Source: Royal Society of Chemistry journal article supplement (doi:10.1039/d4md00301b), 2024-01-01
Supplement: d4md00301b1.pdf [file d4md00301b1.pdf]

## Supporting Information

### **Development of new dehydrocostuslactone derivatives for treatment of atopic dermatitis *via* inhibition of NF- $\kappa$ B signaling pathway**

Xiaoyi Li<sup>†</sup>, Cheng Lu<sup>†</sup>, Wenxia Du<sup>†</sup>, Qiuping Zou, Ruirui Wang, Chunyan Hu, Yanping Li<sup>\*</sup>, Yi Zhang<sup>\*</sup>  
and Zewei Mao<sup>\*</sup>

*School of Chinese Materia Medica, Yunnan University of Chinese Medicine, Kunming 650500, PR China*

|                                            |           |
|--------------------------------------------|-----------|
| <b>1. NMR spectra of derivatives.....</b>  | <b>2</b>  |
| <b>2. HRMS spectra of derivatives.....</b> | <b>17</b> |

---

\* Corresponding author. *E-mail address*: lyp8691@163.com (Y. Li), zhangyi@ynucm.edu.cn (Y. Zhang), maozw@ynucm.edu.cn (Z. Mao).

<sup>†</sup> These authors contributed equally to this work.

## 2. NMR spectra of derivatives

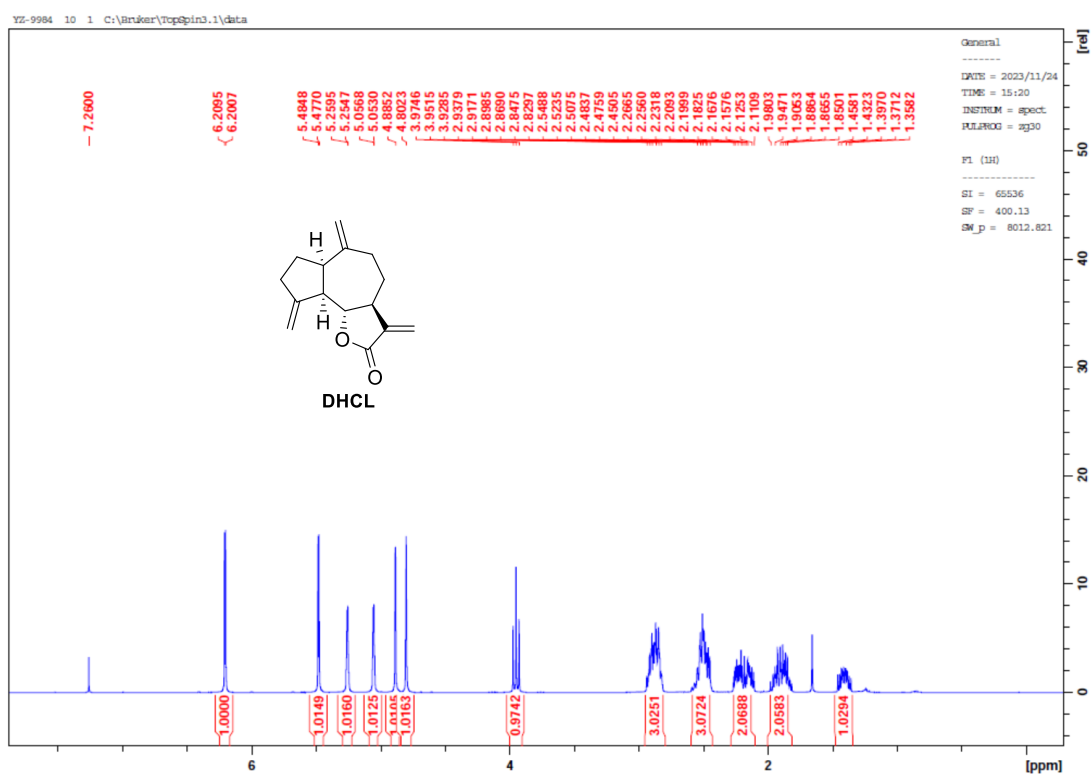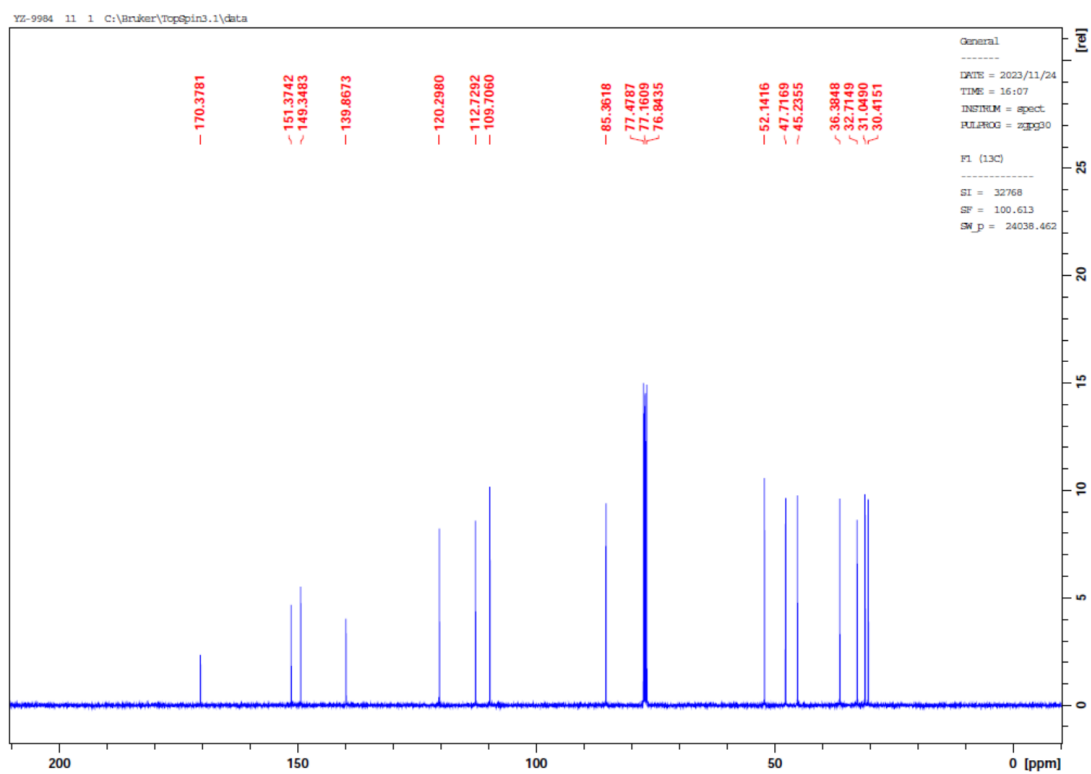

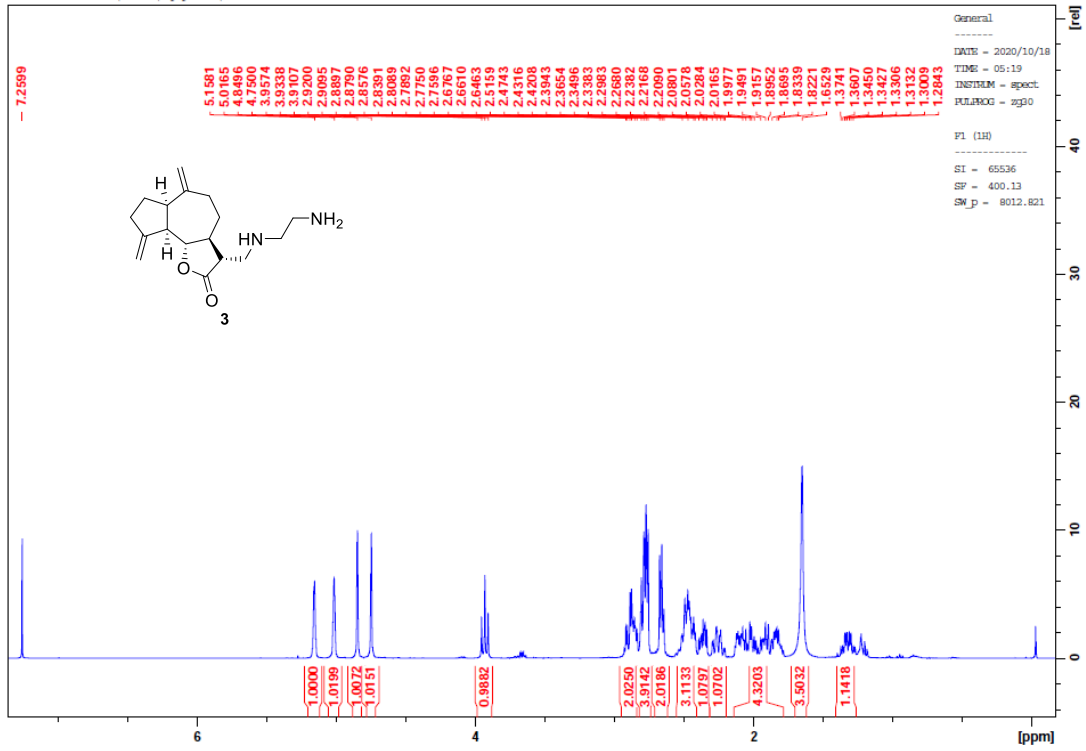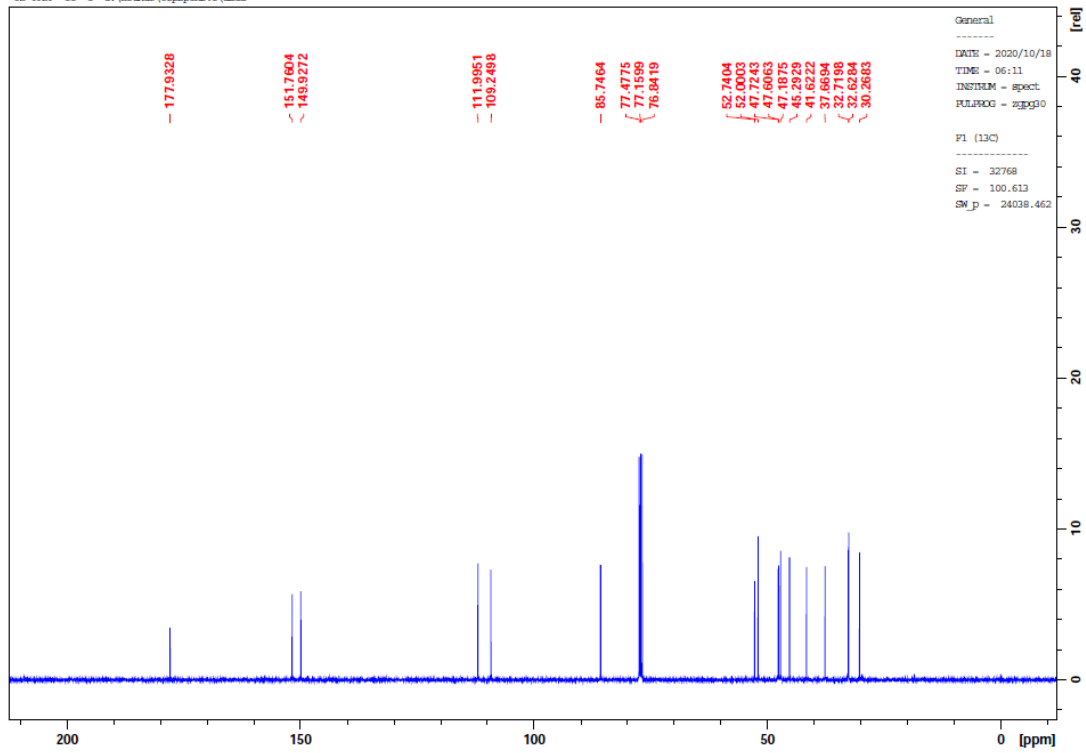

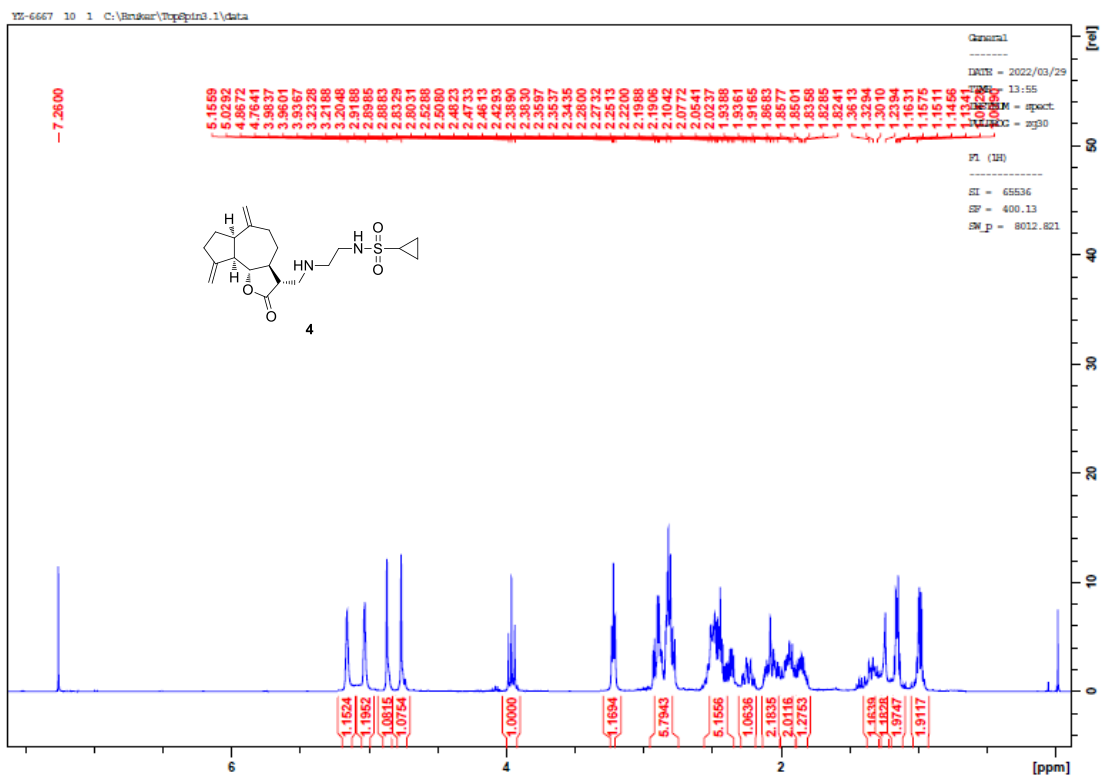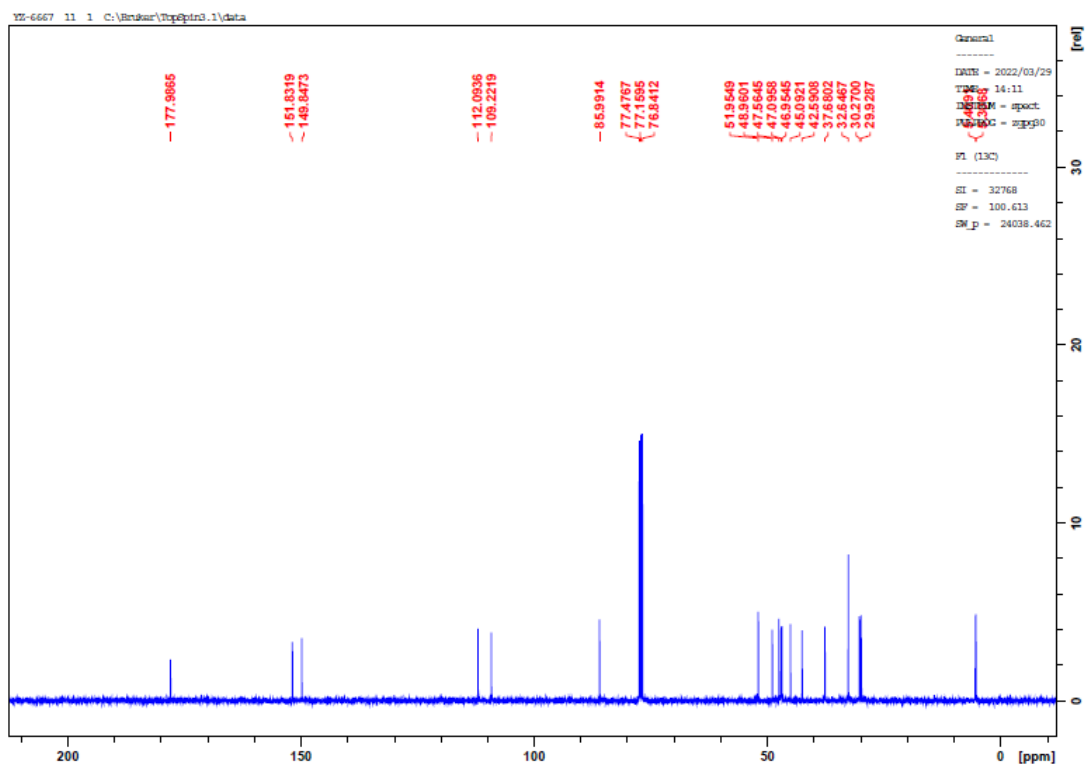

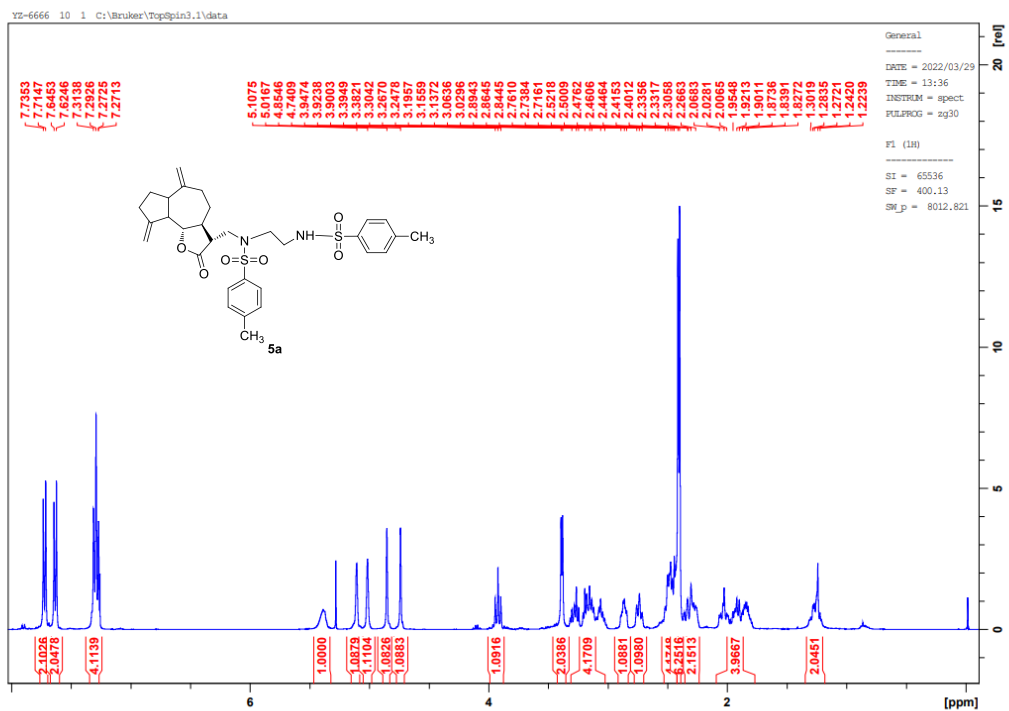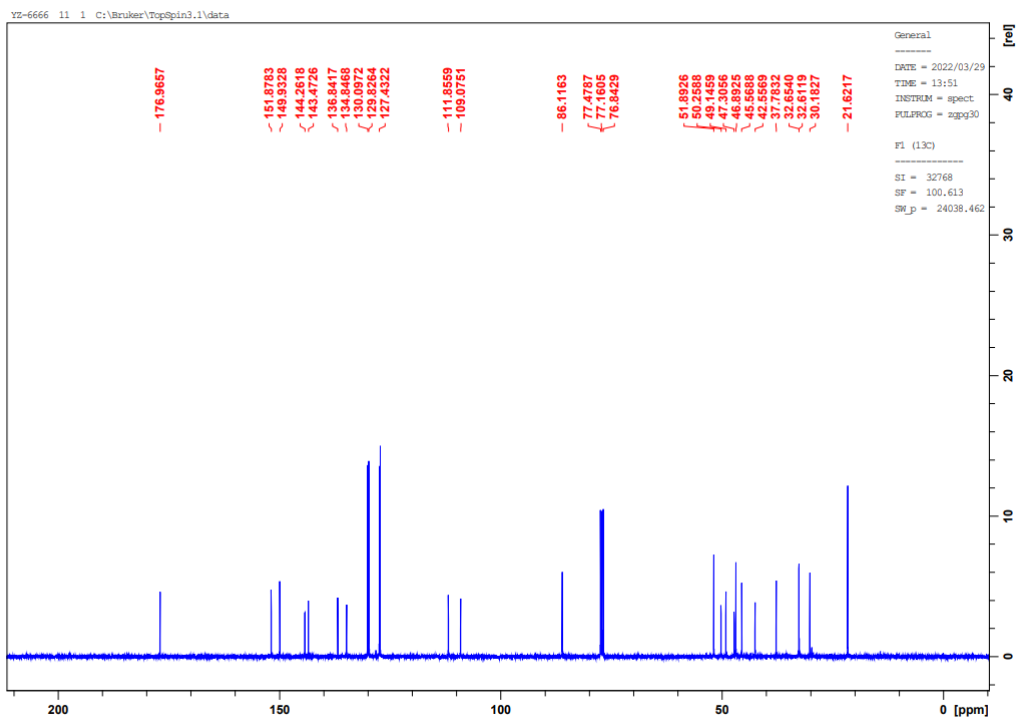

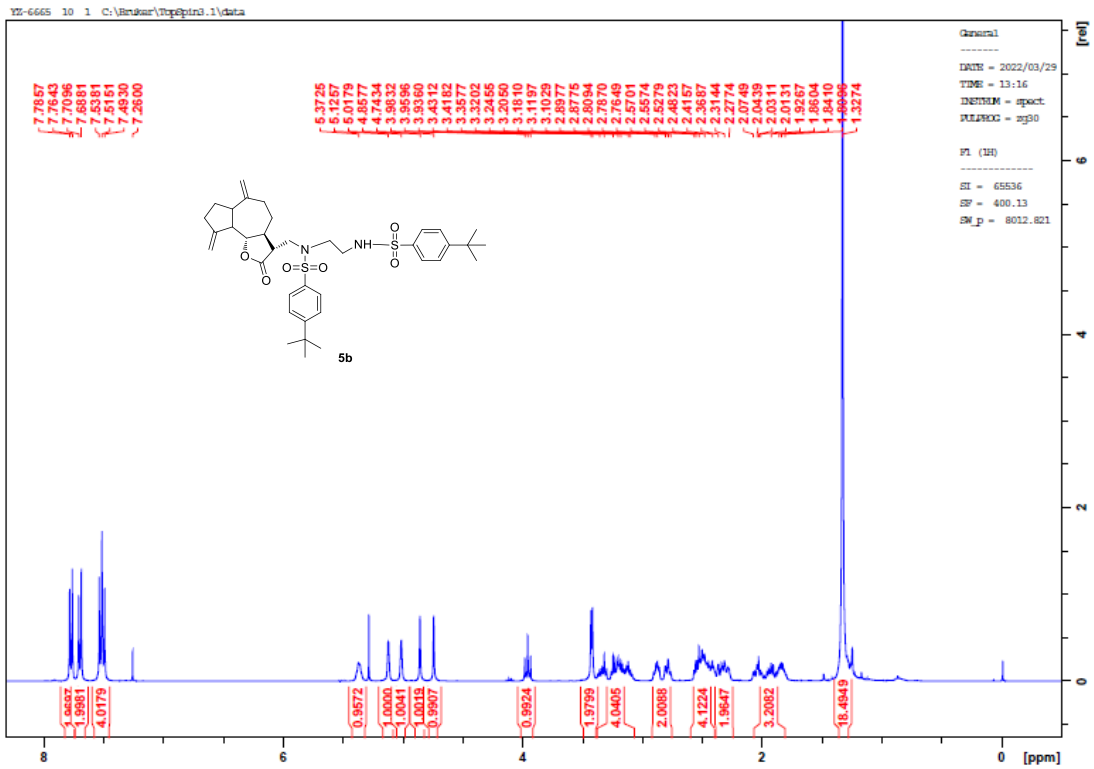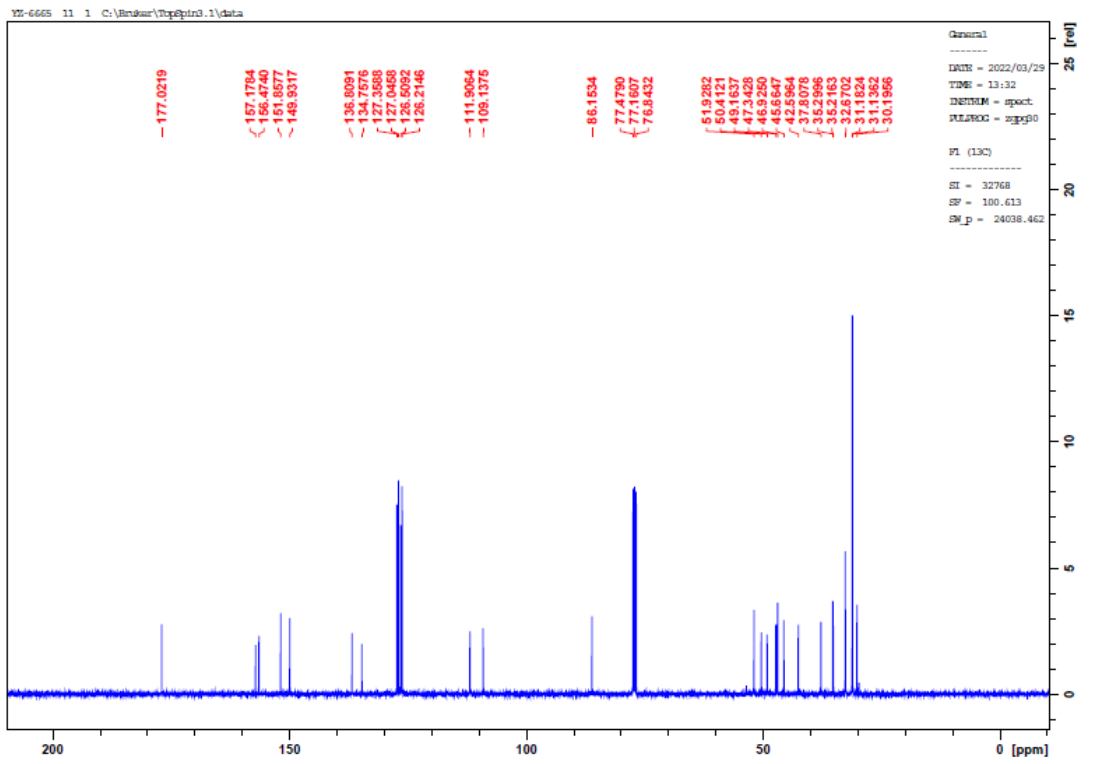

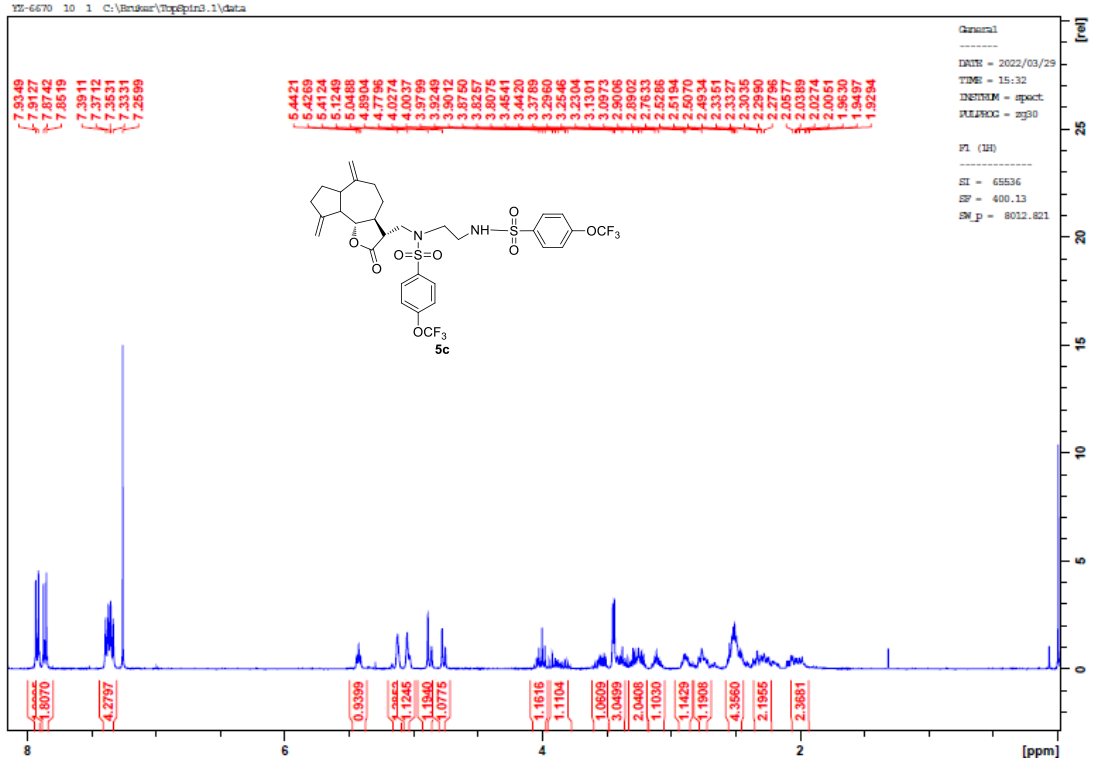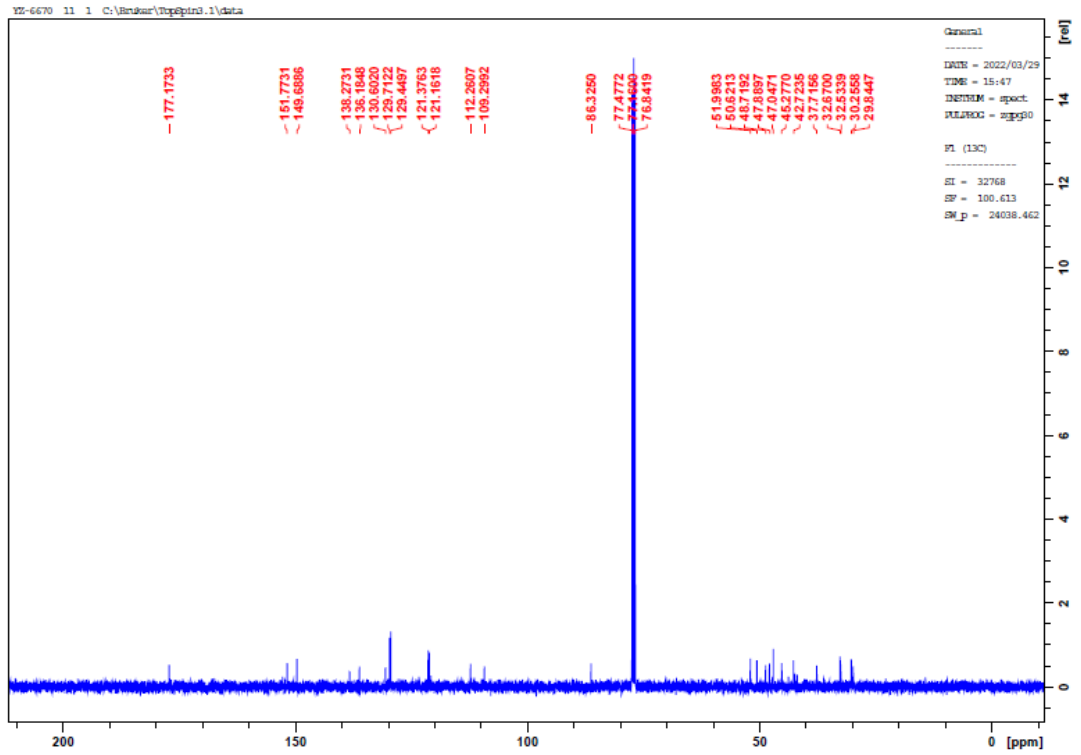

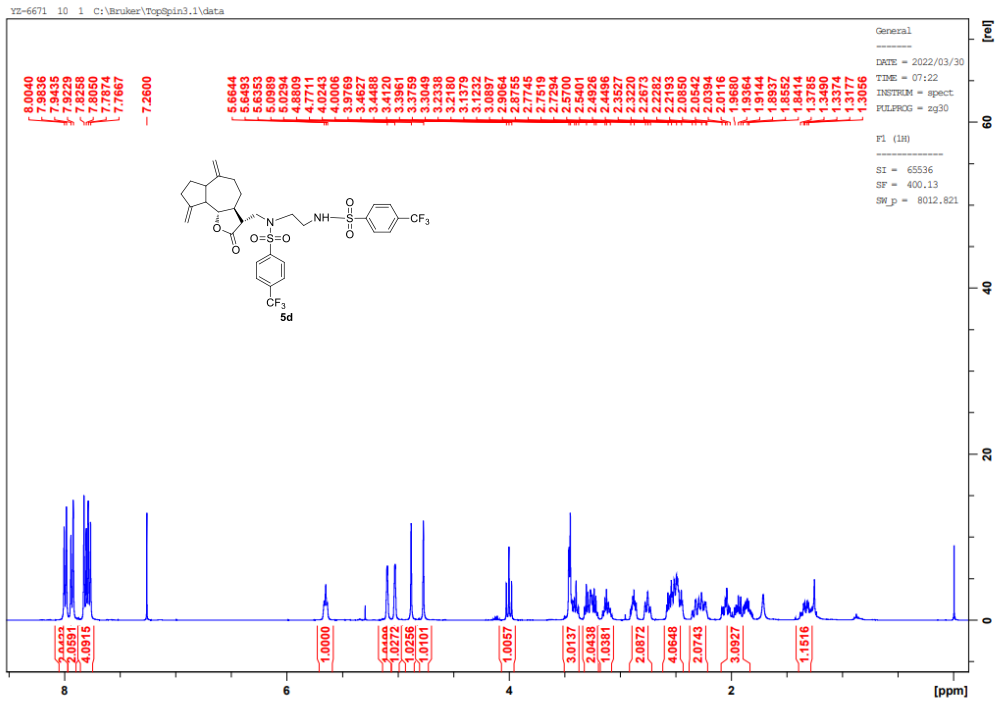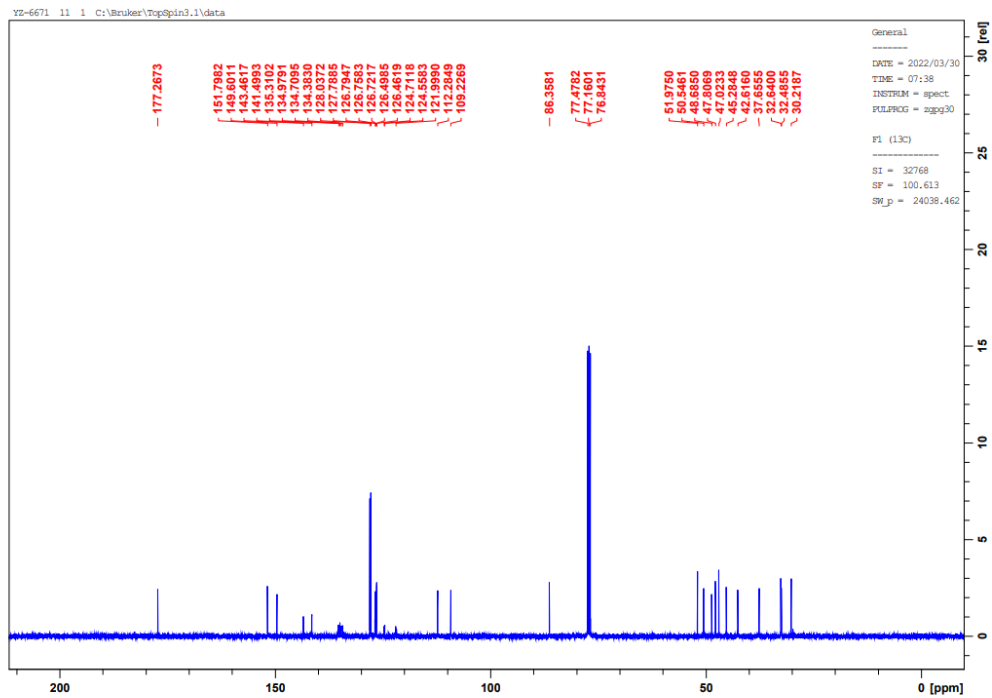



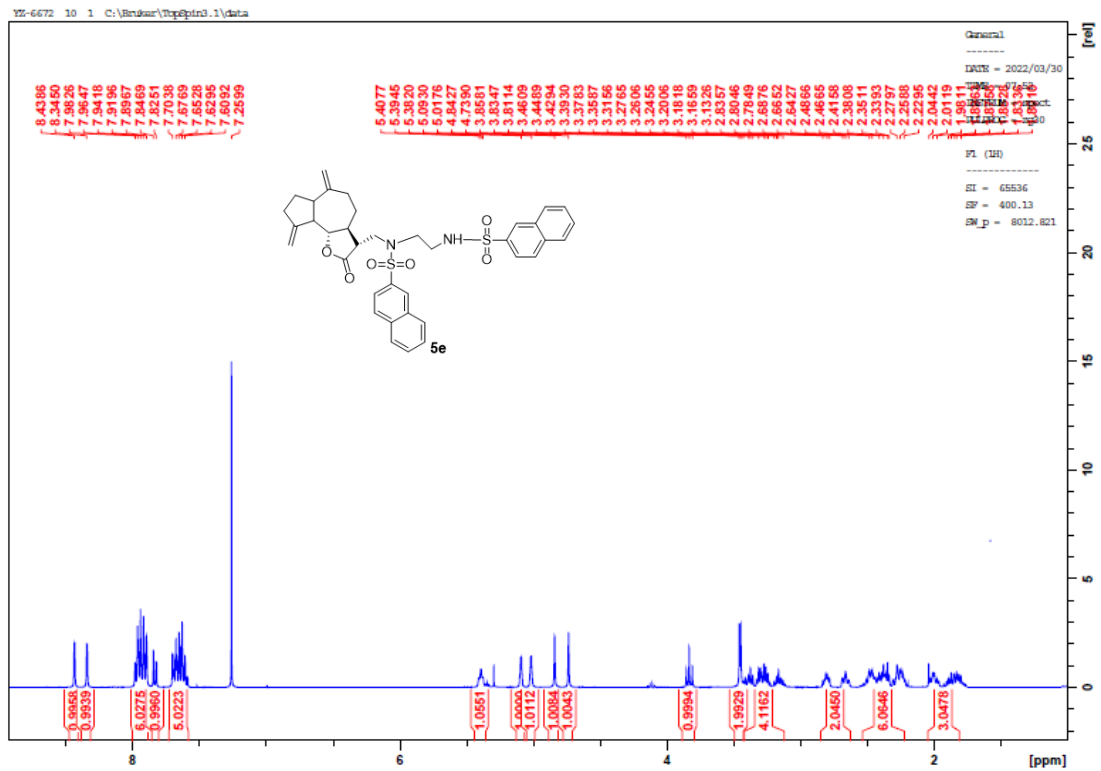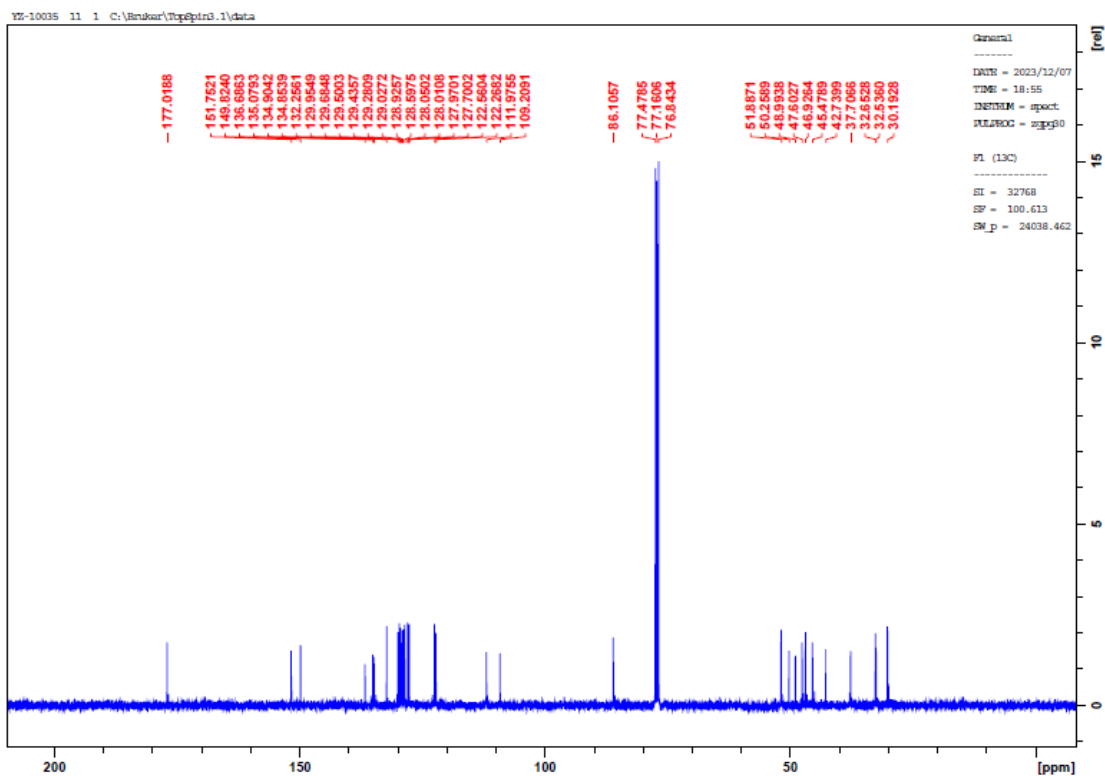



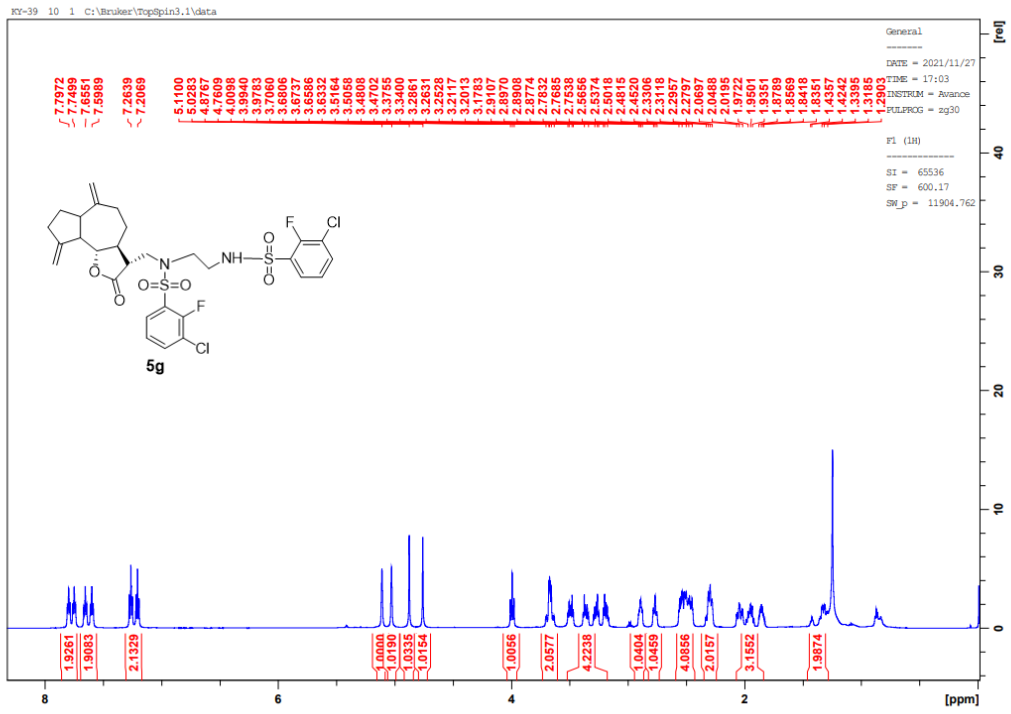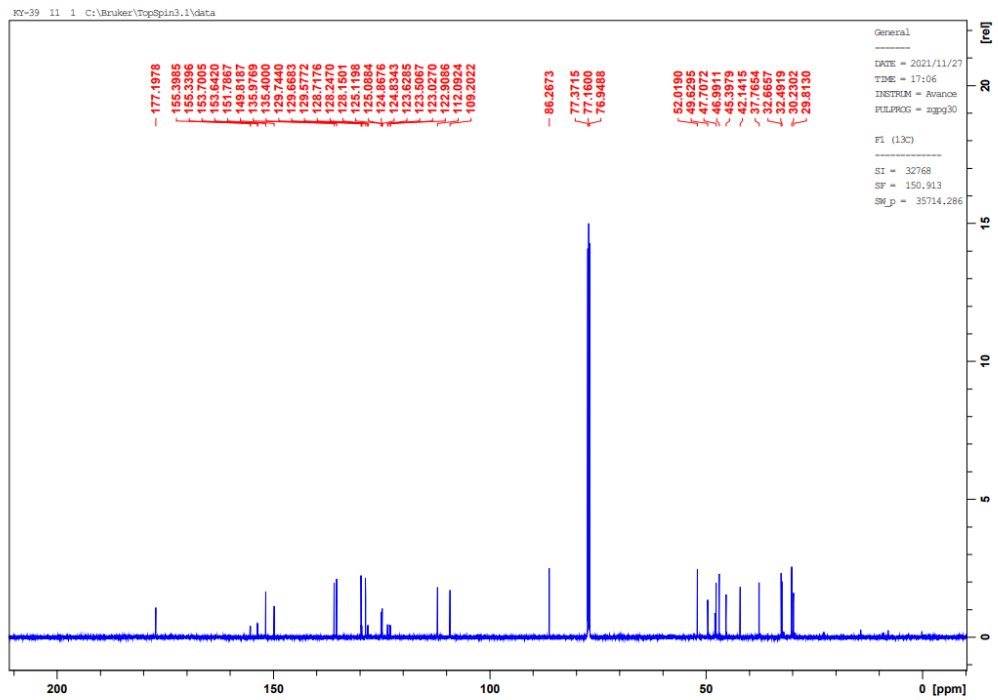



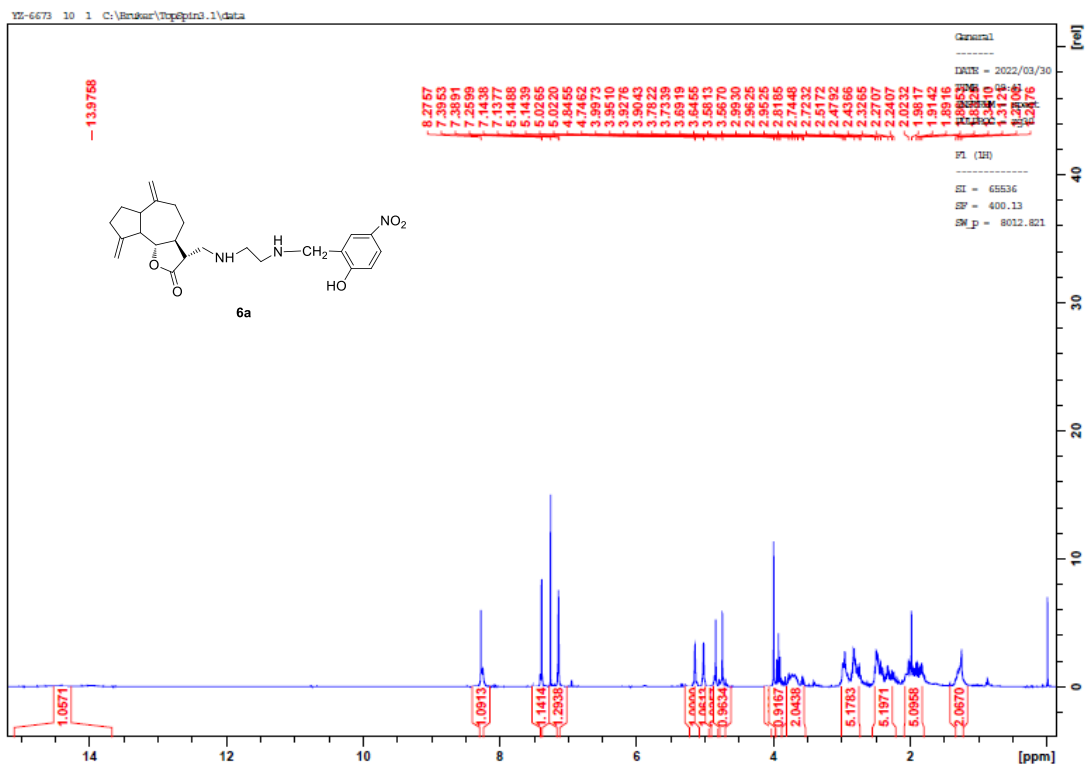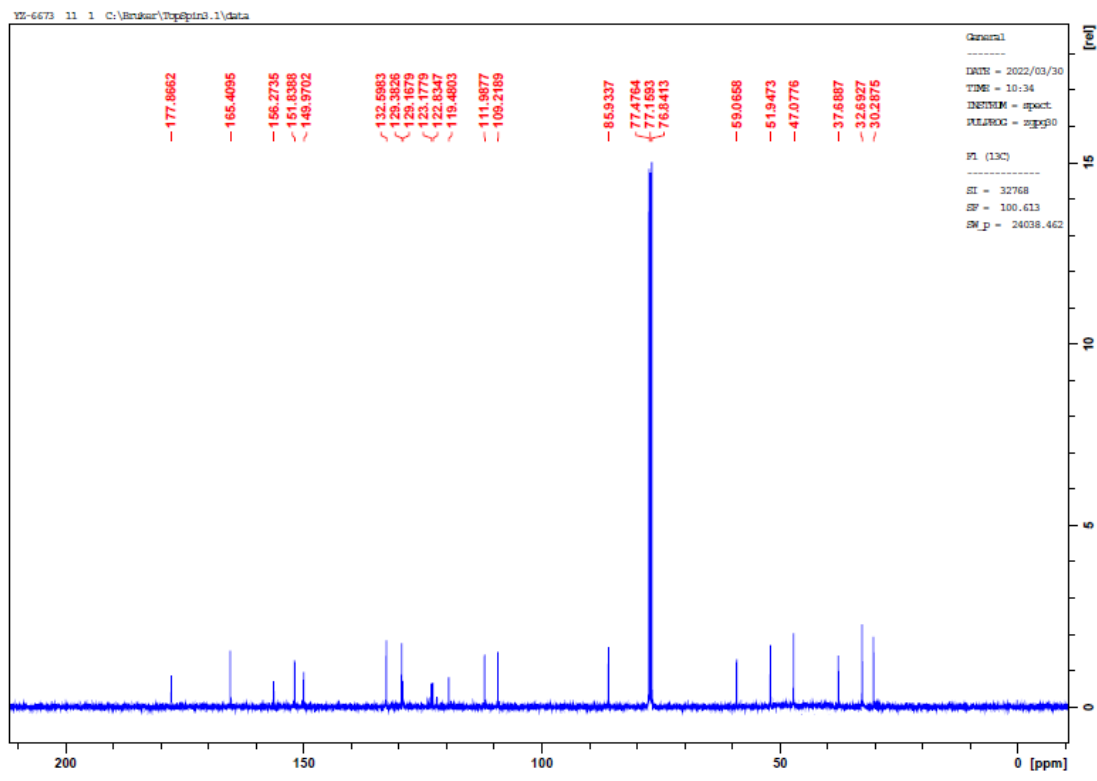

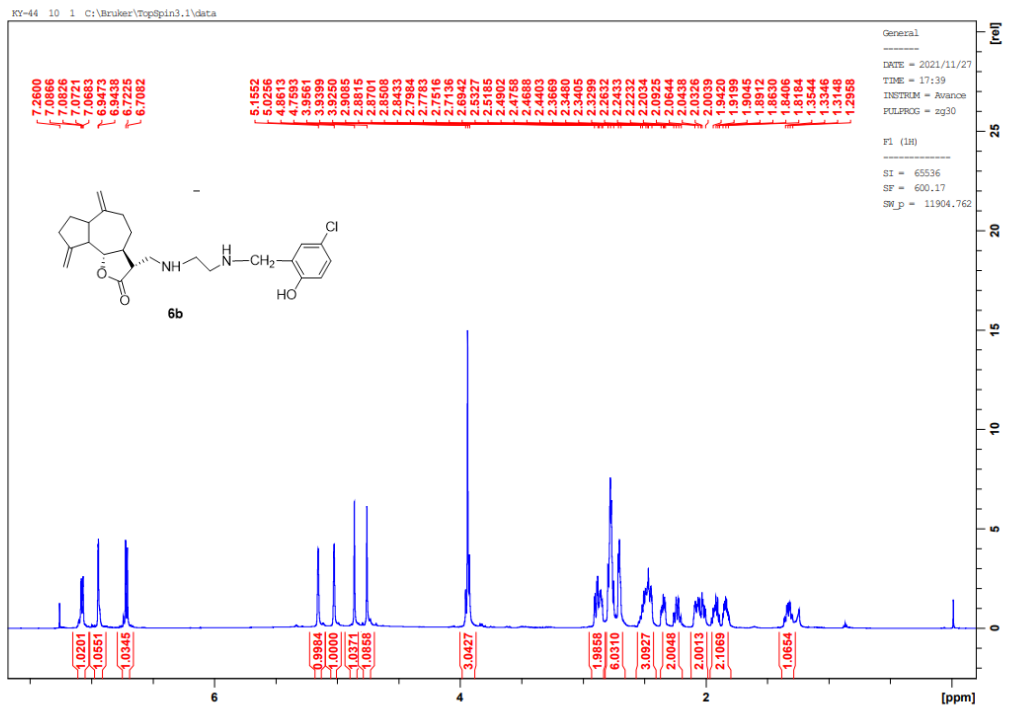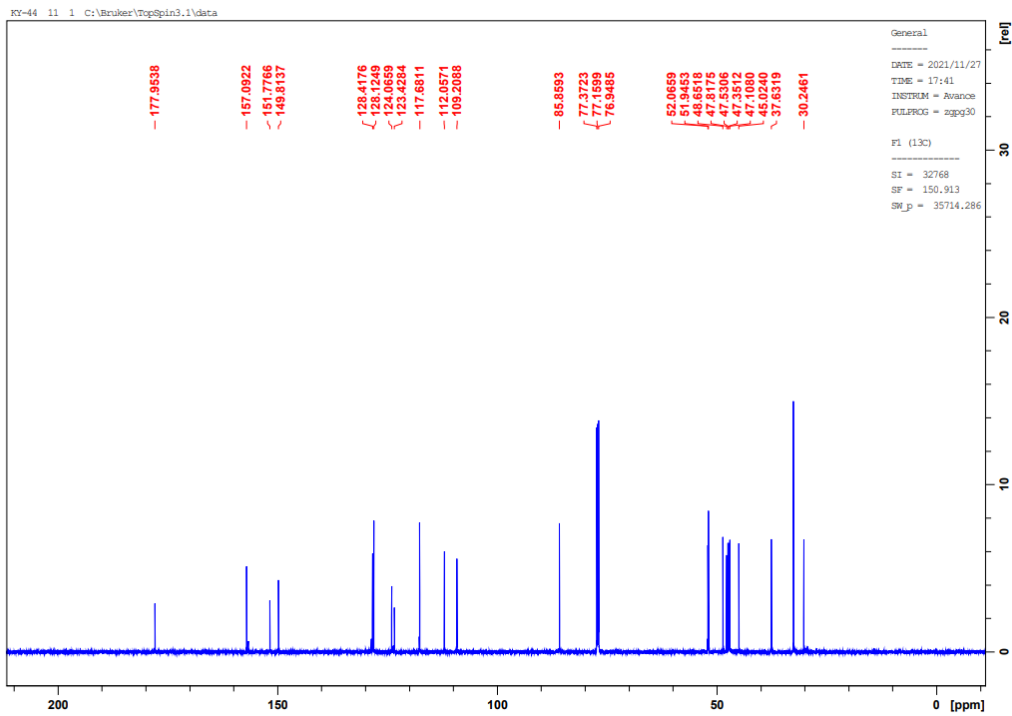

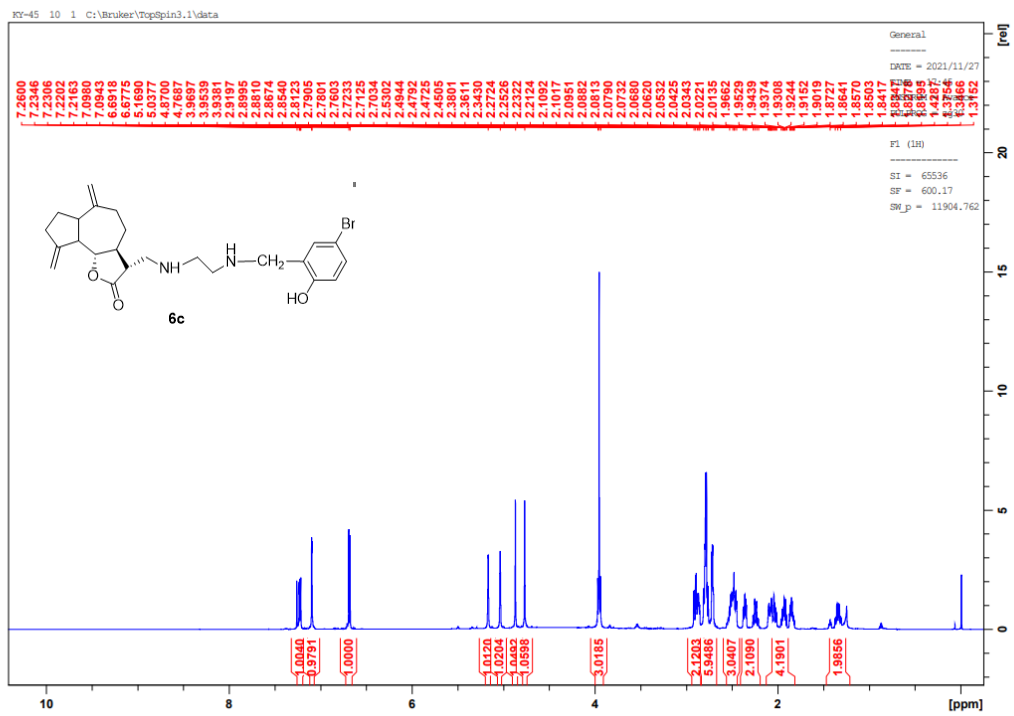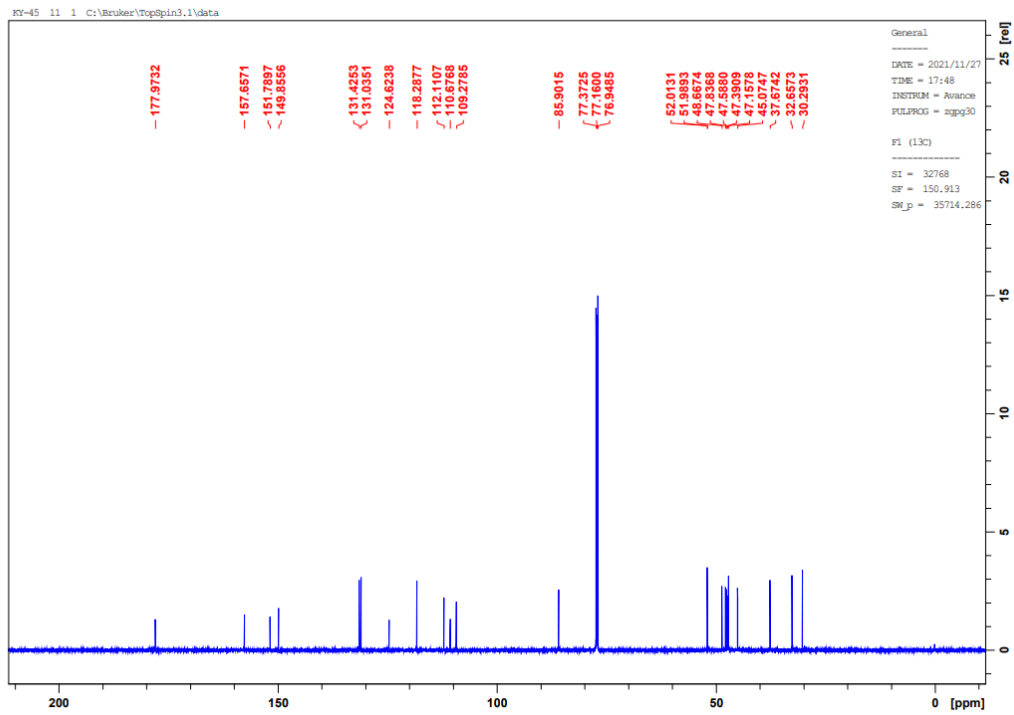

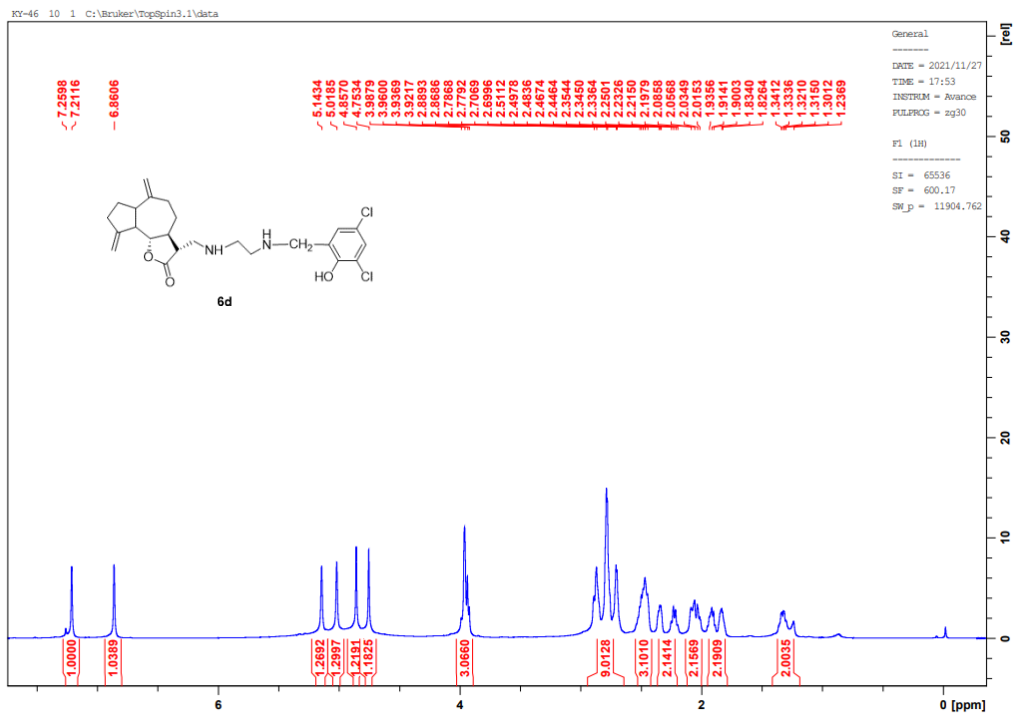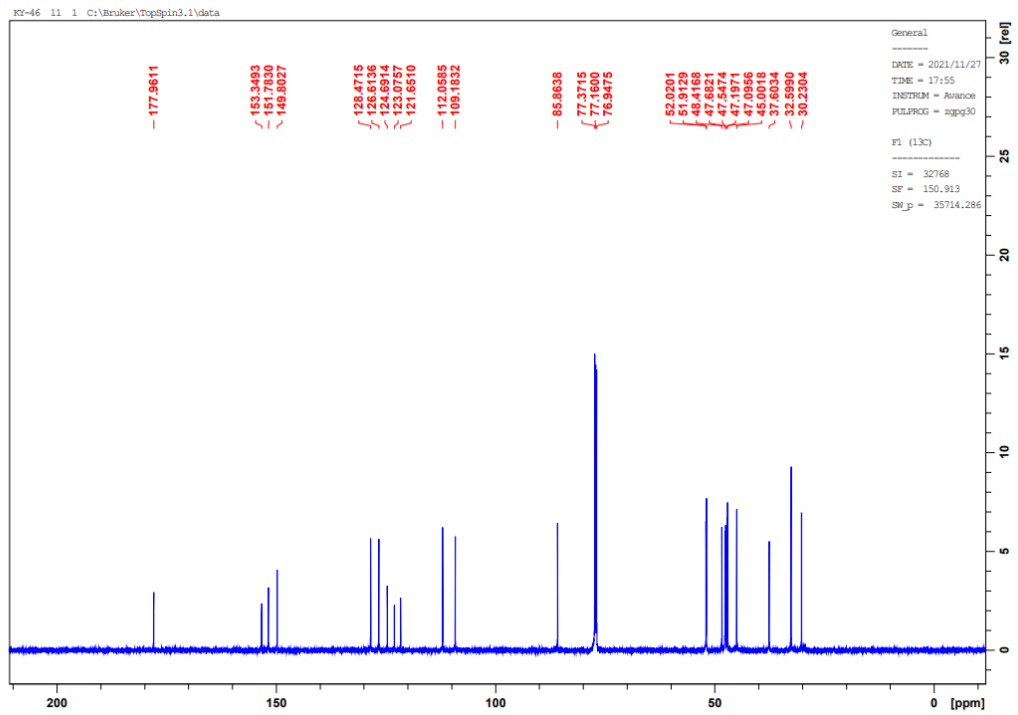



## 2. HRMS spectra

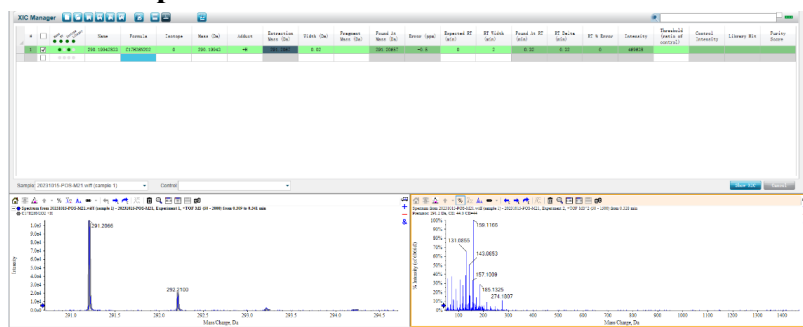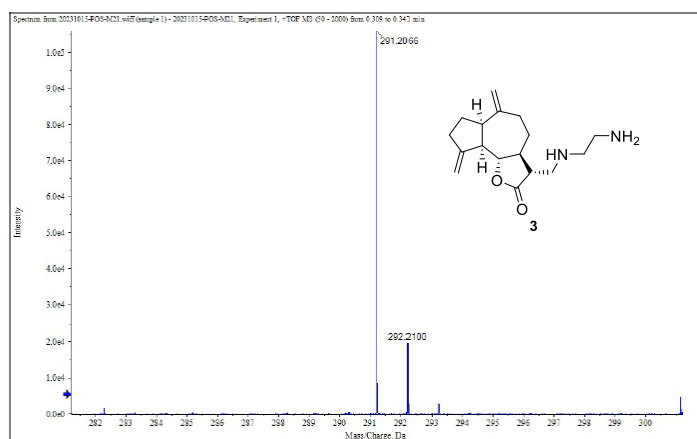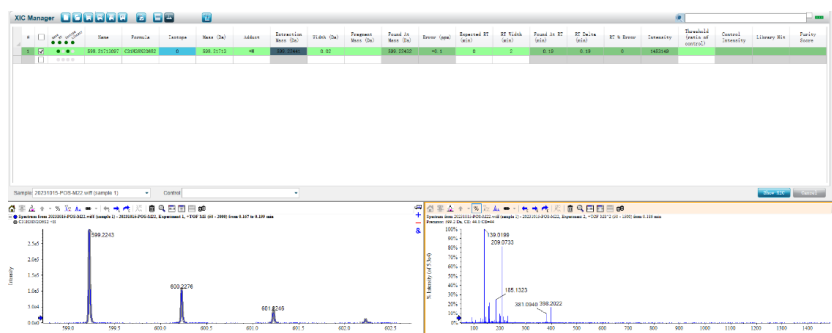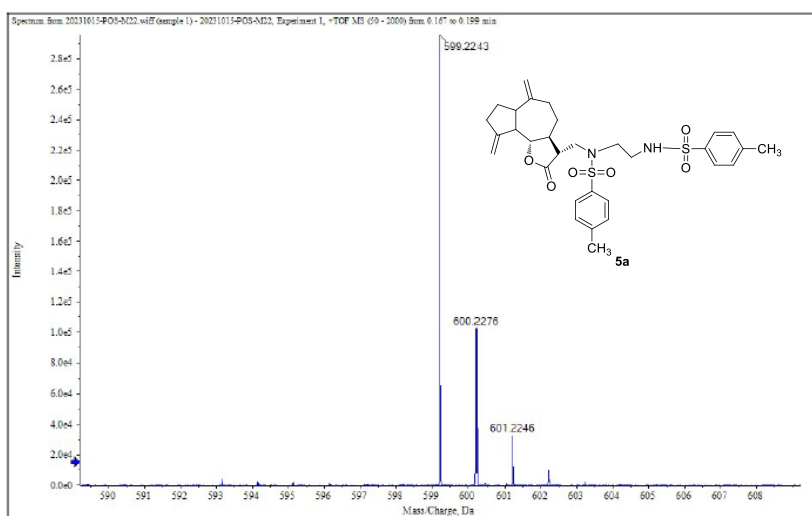

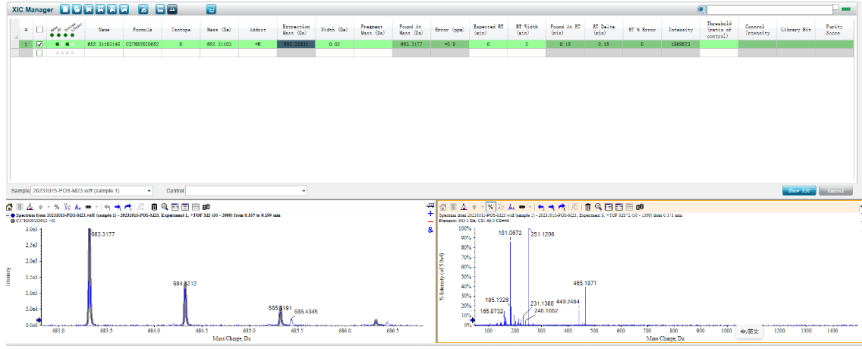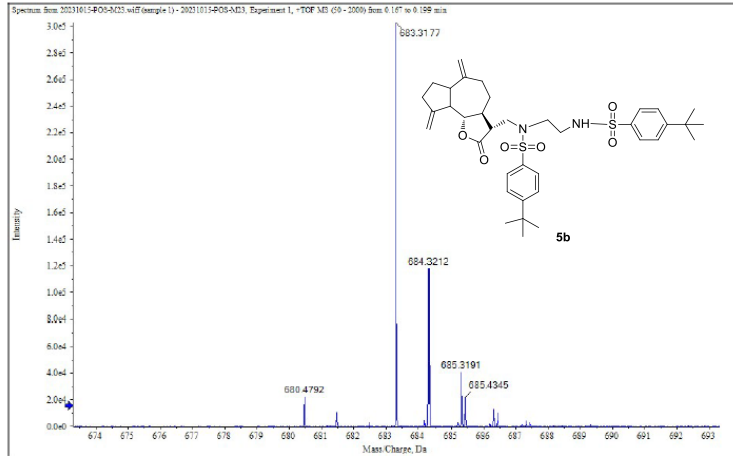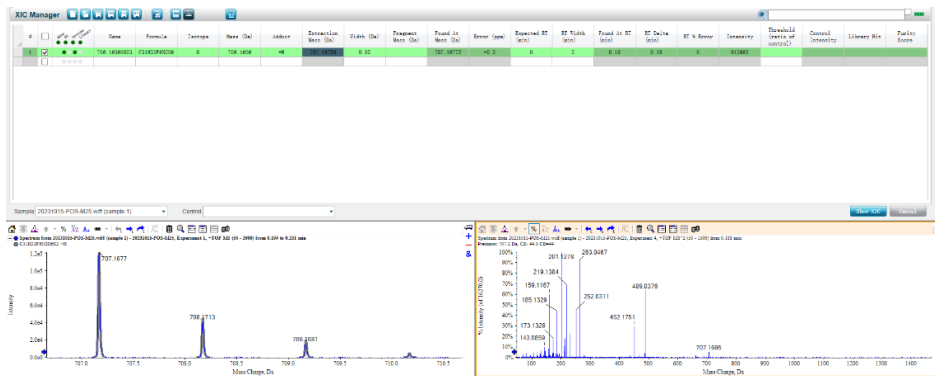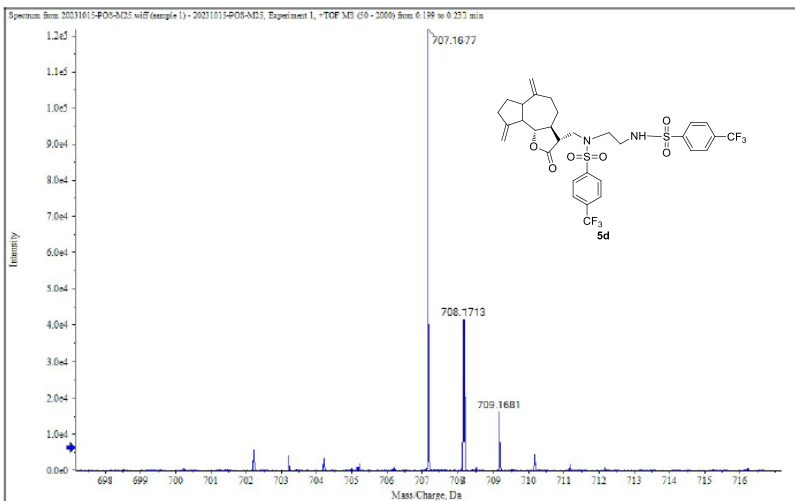

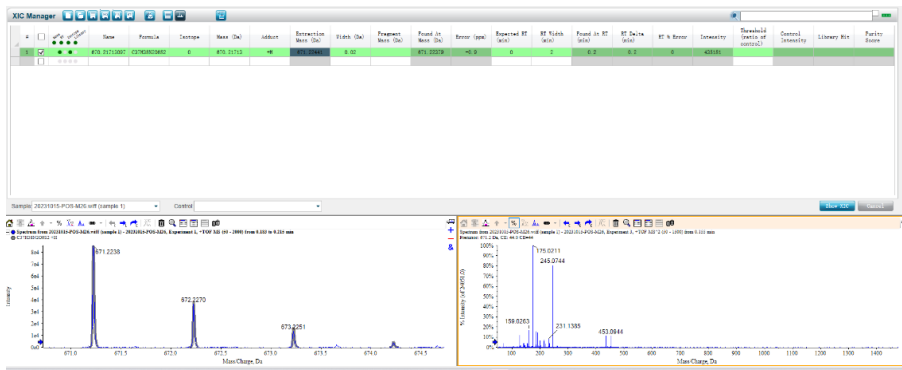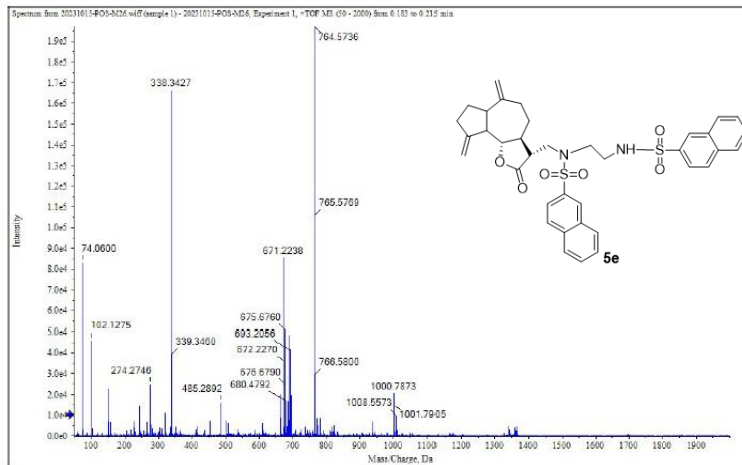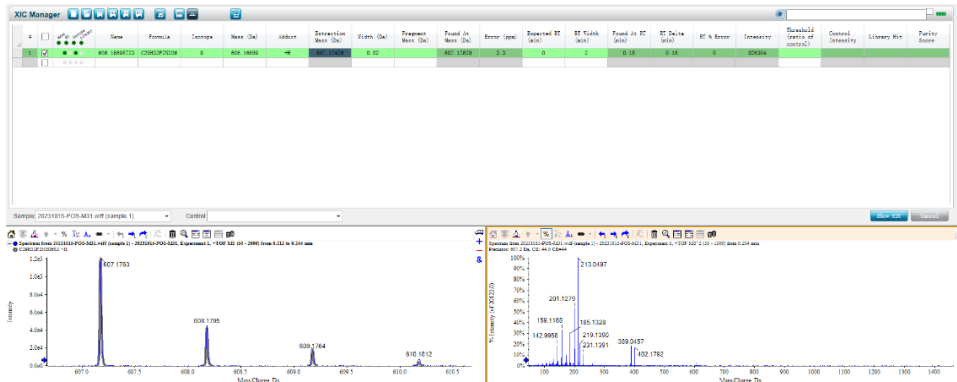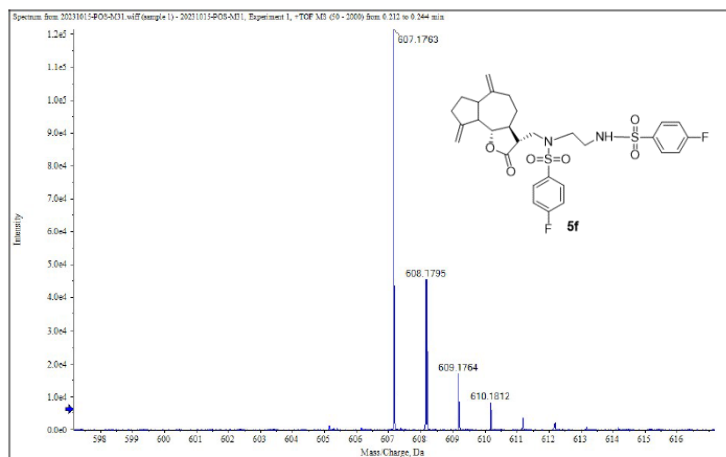

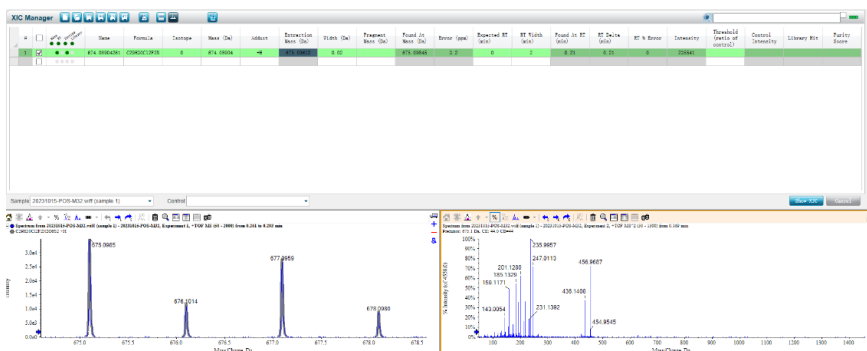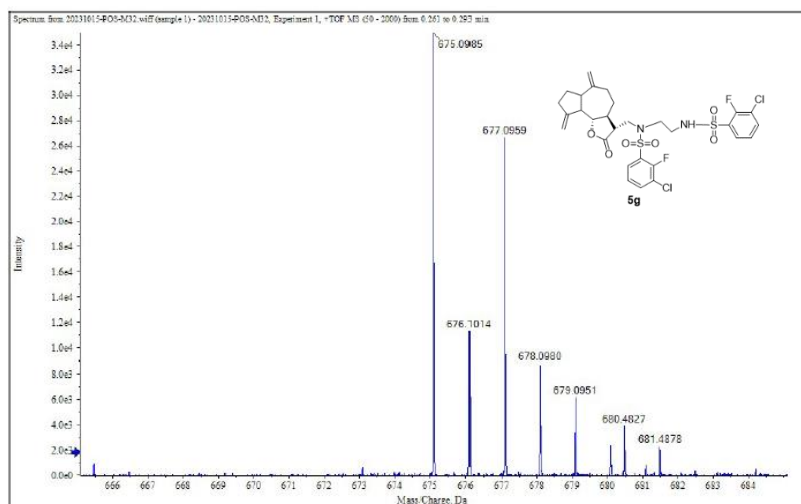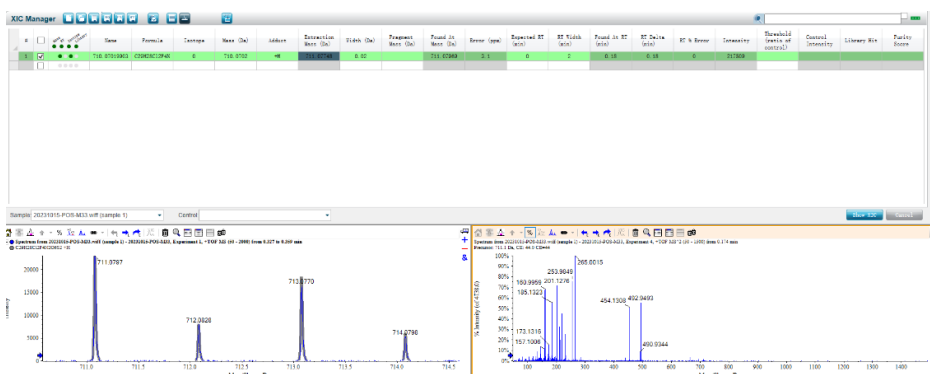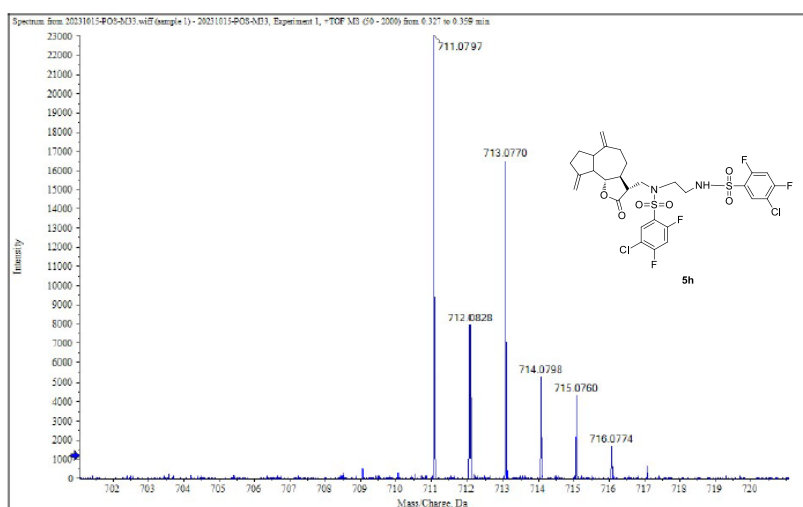

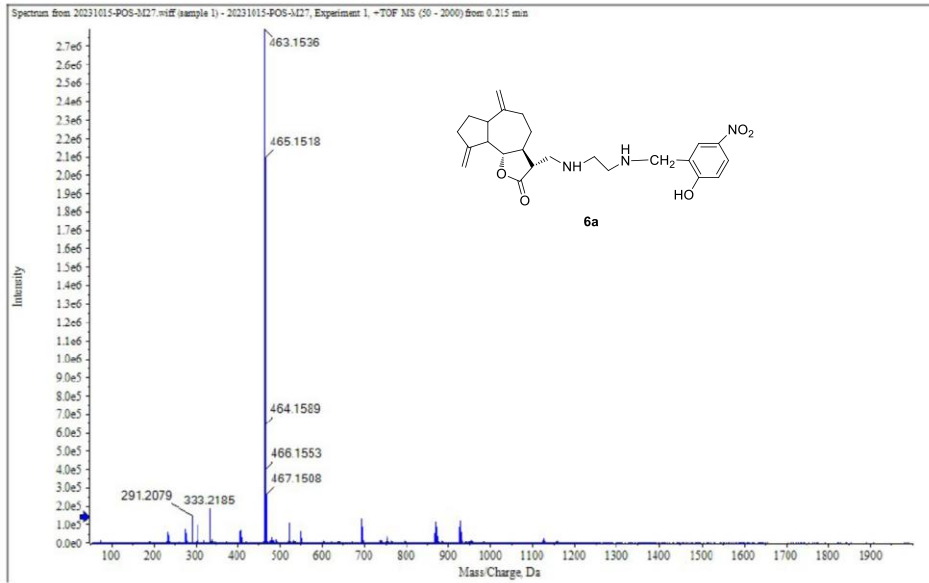

2023/10/17 13:09:10

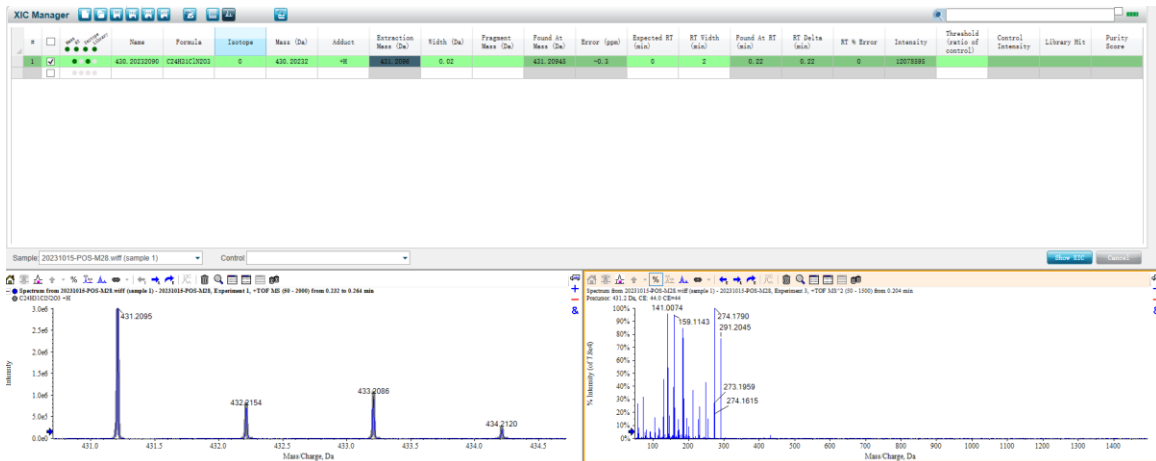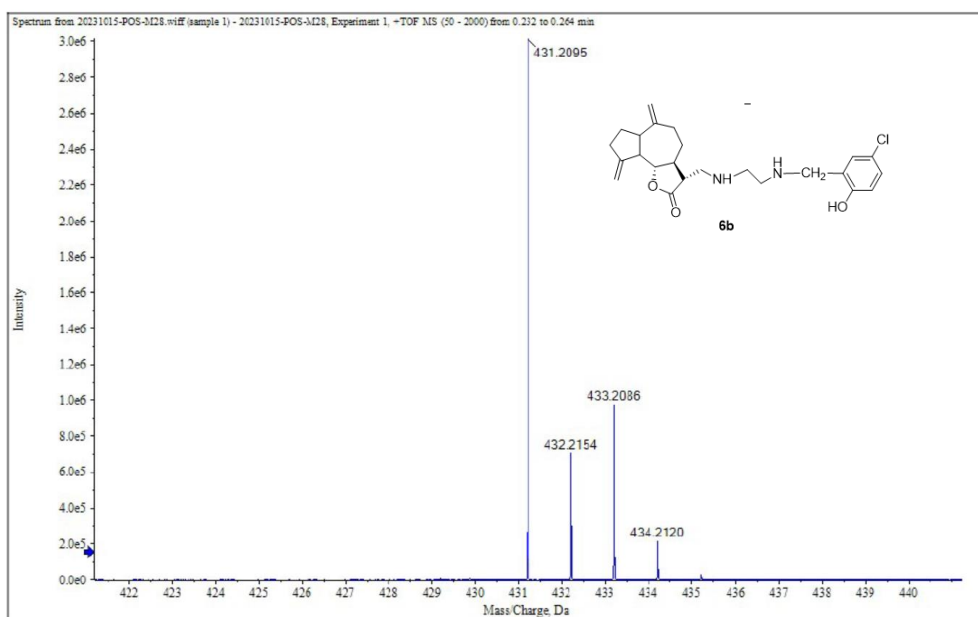

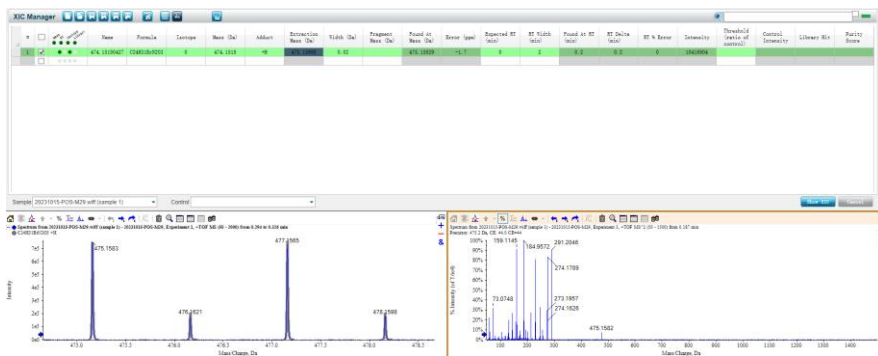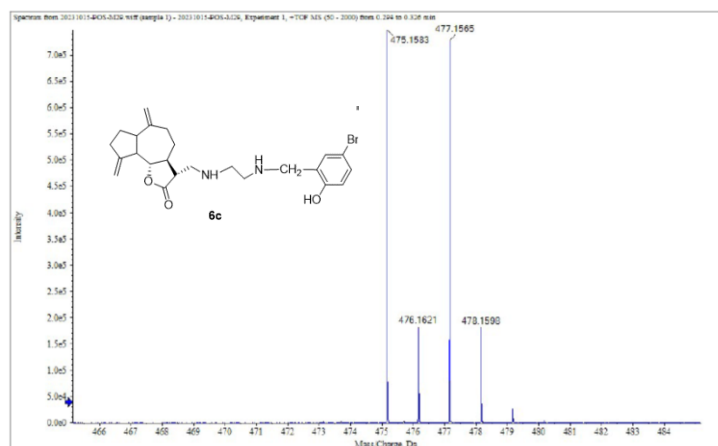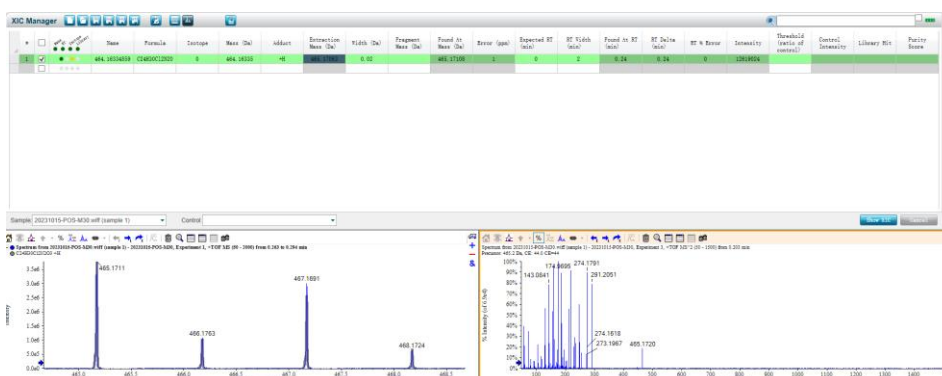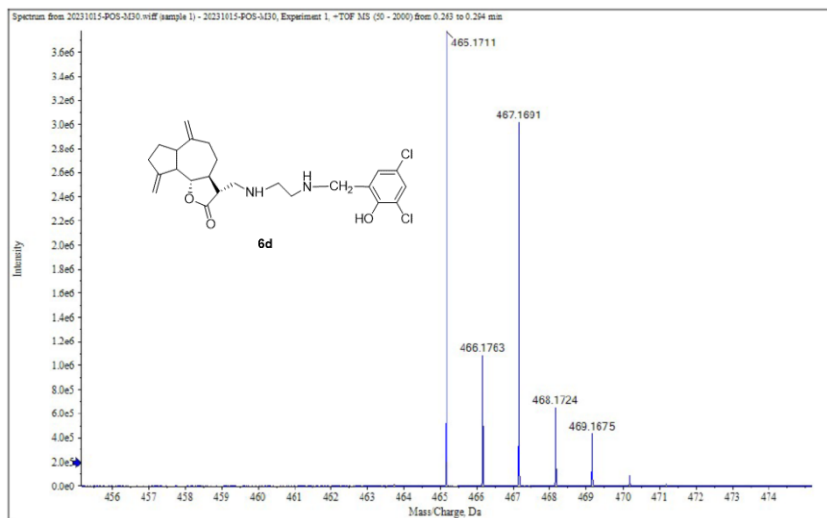

2023/10/17 13:05:44
